# Supplementary material for: Safety, Efficacy, and Immunogenicity of a Novel IgG Degrading Enzyme (KJ103): Results from Two Randomised, Blinded, Phase 1 Clinical Trials
Source: Research Square preprint supplement (doi:10.21203/rs.3.rs-4374237/v1), 2024-05-30
Supplement: Supplementary file 1 [file 3ee184589341ff57fd96b873.xlsx]

## Sheet: Table 1
Table 1 The dose design and participant allocation of KJ103 in single ascending-dose studies
Dose group	Dose	No. of healthy participants (China, SHBJ-2021-002)		No. of healthy participants (New Zealand, SHBJ-2021-001)
		KJ103	Placebo	KJ103	Placebo
			(Normal Saline)		(Normal Saline)
1	0.01 mg/kg	2	0	2	0
2	0.04 mg/kg	6	2	6	2
3	0.12 mg/kg	6	2	6	2
4	0.25 mg/kg	6	2	6	2
5	0.40 mg/kg	6	2	6	2
Total		26	8	26	8

## Sheet: Table 2
Table 2 Demographic characteristics of trial participants
Demographic	Category/ Statistics	Phase Ⅰ - China	Phase Ⅰ - New Zealand
		(N=34)	(N=34)
Sex
Male	n (%)	29 (85.3)	7 (20.6)
Female	n (%)	5 (14.7)	27 (79.4)
Age (years)	Mean	32.1	33.1
Ethnicity
Asian	n (%)	34(100)	3 (8.8)
Caucasian	n (%)	0	20(58.8)
Other	n (%)	0	11 (32.4)

## Sheet: Table 3
Table 3 Listing of TRAEs in two studies
PT	Site	0~24 Hours	Day 2~7	Day 8~14	Day 15~21	Day 22~63	Relationship to Study Medication	Action Taken with	Outcome
(Severity of AE)								Study Treatment
0.01 mg/kg	China		Oral mucositis				Possible	None	Resolved
			(Grade 1)
			Limbs pain				Probable	None	Resolved
			(Grade 1)
0.04 mg/kg	China		Lymph node pain				Possible	None	Resolved
			(Grade 1)
	New Zealand			Nasal congestion			Possible	None	Resolved
				(Grade 1)
0.12 mg/kg	China		Diarrhea				Possible	None	Resolved
			(Grade 1)
					Elevated alanine aminotransferase		Probable	None	Resolved
					(Grade 1)
					Elevated aspartate aminotransferase		Probable	None	Resolved
					(Grade 1)
	New Zealand		Fatigue				Possible	None	Resolving
			(Grade 1)
0.25 mg/kg	China		Bacterial infections				Probable	None	Resolved
			(Grade 1)
			Elevated alanine aminotransferase				Probable	None	Resolved
			(Grade 1)
			Elevated blood uric acid				Possible	None	Resolved
			(Grade 1)
			Elevated gamma-glutamyl transpeptidase				Possible	None	Resolved
			(Grade 1)
						Decreased lymphocyte count (Grade 2)	Possible	None	Resolved
	New Zealand				Vulvovaginal candidiasis		Possible	None	Resolved
					(Grade 1)
			Limb discomfort				Possible	None	Resolved
			(Grade 1)
			Diarrhea				Possible	None	Resolved
			(Grade 2)
			Rash				Possible	None	Resolved
			(Grade 1)
0.40 mg/kg	New Zealand	Infusion related reaction(Grade 2)					Definite	Medication	Resolved
			Deranged liver blood testsa				Probable	None	Resolved
			(Grade 3)
a: The alanine aminotransferase, alkaline phosphatase and aspartate aminotransferase levels of a subject from the 0.40 mg/kg dose group in New Zealand was measured clinically significant. The results are as follows: alanine aminotransferase (Normal range:0~45 U/L) is 228 U/L on day 7, 134 U/L on day 11, and 110 U/L on day 21; alkaline phosphatase (Normal range:40~110 U/L) is 137 U/L on day 7, 127…

## Sheet: Table 4 
Table 4 Summary of PK Parameters
PK Parameter (Unit)	Statistics	China			New Zealand
		0.12 mg/kg	0.25 mg/kg	0.40 mg/kg	0.12 mg/kg	0.25 mg/kg	0.40 mg/kg
		(N=6)	(N=6)	(N=6)	(N=6)	(N=6)	(N=6)
Cmax (mg/L)	Mean (SD)	2.208 (0.4985)	5.142 (0.2922)	9.200 (1.3049)	2.8135 (0.5216)	6.5245 (0.9994)	8.5279 (4.3509)
Tmax (h)	Median	0.333	0.333	0.583	0.4583	0.3333	0.5833
AUC0-t (h*mg/L)	Mean (SD)	28.405 (29.6554)	43.114 (21.7201)	170.261 (176.5502)	45.2515 (47.9476)	101.9423 (113.8636)	56.4783 (29.7341)
AUC0-∞ (h*mg/L)	Mean (SD)	14.426 (9.9368)	28.566 (12.7335)	310.104 (368.8912)	27.3255 (26.0003)	19.4597 (1.9367)	55.8364 (20.6792)
λz (1/h)	Mean (SD)	6.260 (6.1106)	4.862 (2.5096)	81.648 (107.5154)	0.1144 (0.1389)	0.1571 (0.1649)	0.1155 (0.1445)
t1/2 (h)	Mean (SD)	6.260 (6.1106)	4.862 (2.5096)	81.648 (107.5154)	11.3978 (13.3972)	2.2629 (0.1476)	8.4130 (8.0801)
MRT0-∞ (h)	Mean (SD)	7.956 (7.8214)	5.714 (2.7533)	196.187 (268.7298)	14.7852 (17.5298)	2.9775 (0.2253)	8.9927 (7.8506)
CL (L/h/kg)	Mean (SD)	0.011 (0.0075)	0.011 (0.0063)	0.004 (0.0052)	0.0079 (0.0054)	0.0129 (0.0014)	0.0079 (0.0027)
Vz (L/kg)	Mean (SD)	0.065 (0.0283)	0.059 (0.0076)	0.113 (0.0661)	0.0592 (0.0197)	0.0423 (0.0054)	0.0836 (0.0710)

## Sheet: Table 5 
Table 5 Changes in ADA
Visits	Statistics	China	New Zealand
Pre-dose	N	34	34
	Median	0	0
	Min,Max	0，1:429.61	0，1:242.58
D7	N	26	26
	Median	0	0
	Min,Max	0，1:408.25	0，1:246.78
D14	N	26	26
	Median	1:1041.97	1:257.50
	Min,Max	0，1:144433.38	0，1:20855.78
D63	N	24	25
	Median	1:605.89	1:158.64
	Min,Max	<1:10，1:10989.27	<1:10，1:7171.39
D180	N	25	25
	Median	1:524.77	1:214.35
	Min,Max	0，1:4921.42	0，1:5782.43
